# Supplementary material for: Greatly enhanced optical anisotropy in thiophosphates inspired by rational coupling of tetrahedra and ethane-like [P2S6]4− groups
Source: Royal Society of Chemistry journal article supplement (doi:10.1039/d4qi00883a), 2024-01-01
Supplement: d4qi00883a1.pdf [file d4qi00883a1.pdf]

**Greatly enhanced optical anisotropy in thiophosphates inspired by rational  
coupling tetrahedra and ethane-like [P<sub>2</sub>S<sub>6</sub>]<sup>4-</sup> groups**

Ning Zhao, Dazhi Lu,\* Jingjing Xu, Kui Wu,\* Haohai Yu,\* Huaijin Zhang

State Key Laboratory of Crystal Materials and Institute of Crystal Materials,  
Shandong University, Jinan, China.

*To whom correspondence should be addressed:*

*Dazhi Lu (dazhi.lu@sdu.edu.cn); Kui Wu (wukui@sdu.edu.cn);*

*Haohai Yu (haohaiyu@sdu.edu.cn)*

**CONTENTS**

1. Tables
2. Figures
3. References

## 1. Tables

**Table S1.** The summary of raw materials and the ratio, sintering temperature, crystal color, yield, and the stability of the six new synthesized thiophosphates.

| Compounds                                       | Raw materials and the ratio                                                             | Temperature (°C) | Crystal color | Yield | Stability |
|-------------------------------------------------|-----------------------------------------------------------------------------------------|------------------|---------------|-------|-----------|
| Na <sub>4</sub> MgP <sub>2</sub> S <sub>8</sub> | Na <sub>2</sub> S/MgS/P <sub>2</sub> S <sub>5</sub> = 2:1:1                             | 750              | colorless     | >95%  | unstable  |
| Na <sub>3</sub> SbP <sub>2</sub> S <sub>8</sub> | Na <sub>2</sub> S/Sb <sub>2</sub> S <sub>3</sub> /P <sub>2</sub> S <sub>5</sub> = 3:1:2 | 700              | yellow        | >95%  | stable    |
| KGaP <sub>2</sub> S <sub>6</sub>                | K/Ga <sub>2</sub> S <sub>3</sub> /P <sub>2</sub> S <sub>5</sub> /P = 10:5:9:2           | 750              | colorless     | >95%  | stable    |
| Na <sub>3</sub> CuP <sub>2</sub> S <sub>6</sub> | Na/Cu/P <sub>2</sub> S <sub>5</sub> /S = 3:1:1:1                                        | 750              | red           | -     | unstable  |
| K <sub>3</sub> CuP <sub>2</sub> S <sub>6</sub>  | K/Cu/P <sub>2</sub> S <sub>5</sub> /S = 3:1:1:1                                         | 750              | yellow        | >95%  | unstable  |
| Na <sub>2</sub> ZnP <sub>2</sub> S <sub>6</sub> | Na/ZnS/P/S = 2:1:2:5                                                                    | 600              | colorless     | >95%  | stable    |

**Table S2.** The summary of space group, P-S group, link modes of MS<sub>n</sub> and P-S groups, experimental band gap ( $E_{g(\text{exp.})}$ ), calculated band gap ( $E_{g(\text{cal.})}$ ) and birefringence ( $\Delta n$ ) in A-M-P-S system.

| A-M-P-S system                                                | Space group             | P-S group                                      | Link modes of MS <sub>n</sub> and P-S groups                               | $E_{g(\text{exp.})}$ (eV) | $E_{g(\text{cal.})}$ (eV) | $\Delta n$ |
|---------------------------------------------------------------|-------------------------|------------------------------------------------|----------------------------------------------------------------------------|---------------------------|---------------------------|------------|
| Na <sub>4</sub> MgP <sub>2</sub> S <sub>8</sub>               | <i>P2/n</i>             | (PS <sub>4</sub> ) <sup>3-</sup>               | 0D [Mg <sub>2</sub> P <sub>4</sub> S <sub>16</sub> ] <sup>8-</sup> cluster | 3.48                      | 3.097                     | 0.037      |
| K <sub>4</sub> MgP <sub>2</sub> S <sub>8</sub> <sup>[1]</sup> | <i>P2/c</i>             | (PS <sub>4</sub> ) <sup>3-</sup>               | 0D [Mg <sub>2</sub> P <sub>4</sub> S <sub>16</sub> ] <sup>8-</sup> cluster | 3.60                      | 2.870                     | 0.034      |
| Na <sub>3</sub> SbP <sub>2</sub> S <sub>8</sub>               | <i>P2<sub>1</sub>/c</i> | (PS <sub>4</sub> ) <sup>3-</sup>               | 0D [SbP <sub>2</sub> S <sub>8</sub> ] <sup>3-</sup> cluster                | 2.26                      | 2.076                     | 0.107      |
| KGaP <sub>2</sub> S <sub>6</sub>                              | <i>C2/c</i>             | (P <sub>2</sub> S <sub>6</sub> ) <sup>4-</sup> | 1D [GaP <sub>2</sub> S <sub>6</sub> ] <sub>n</sub> chain                   | 3.40                      | 2.670                     | 0.068      |
| NaAlP <sub>2</sub> S <sub>6</sub> <sup>[2]</sup>              | <i>Fdd2</i>             | (P <sub>2</sub> S <sub>6</sub> ) <sup>4-</sup> | 3D network                                                                 | -                         | 3.574                     | 0.076      |
| Na <sub>3</sub> CuP <sub>2</sub> S <sub>6</sub>               | <i>P2<sub>1</sub>/c</i> | (P <sub>2</sub> S <sub>6</sub> ) <sup>4-</sup> | 1D [CuP <sub>2</sub> S <sub>6</sub> ] <sub>n</sub> chain                   | -                         | 2.337                     | 0.151      |
| K <sub>3</sub> CuP <sub>2</sub> S <sub>6</sub>                | <i>P2<sub>1</sub>/c</i> | (P <sub>2</sub> S <sub>6</sub> ) <sup>4-</sup> | 1D [CuP <sub>2</sub> S <sub>6</sub> ] <sub>n</sub> chain                   | 2.27                      | 2.188                     | 0.124      |
| K <sub>2</sub> ZnP <sub>2</sub> S <sub>6</sub> <sup>[3]</sup> | <i>C2/c</i>             | (P <sub>2</sub> S <sub>6</sub> ) <sup>4-</sup> | 1D [ZnP <sub>2</sub> S <sub>6</sub> ] <sub>n</sub> chain                   | -                         | 3.033                     | 0.150      |
| Na <sub>2</sub> ZnP <sub>2</sub> S <sub>6</sub>               | <i>P2<sub>1</sub>/n</i> | (P <sub>2</sub> S <sub>6</sub> ) <sup>4-</sup> | 2D layer                                                                   | 3.26                      | 2.940                     | 0.136      |
| KSbP <sub>2</sub> S <sub>6</sub> <sup>[4,5]</sup>             | <i>P2<sub>1</sub></i>   | (P <sub>2</sub> S <sub>6</sub> ) <sup>4-</sup> | 2D layer                                                                   | 2.9(1) <sup>[5]</sup>     | 2.192                     | 0.186      |

**Table S3.** The distorted degrees ( $\Delta d$ ) of  $MS_4$  in A-M-P-S system.

| A-M-P-S system | $MS_4$  | $\Delta d$ |
|----------------|---------|------------|
| $Na_3SbP_2S_8$ | $SbS_4$ | 4.805      |
| $KGaP_2S_6$    | $GaS_4$ | 0.062      |
| $Na_3CuP_2S_6$ | $CuS_4$ | 0.278      |
| $K_3CuP_2S_6$  | $CuS_4$ | 1.239      |
| $K_2ZnP_2S_6$  | $ZnS_4$ | 0.054      |
| $Na_2ZnP_2S_6$ | $ZnS_4$ | 0.163      |

## 2. Figures

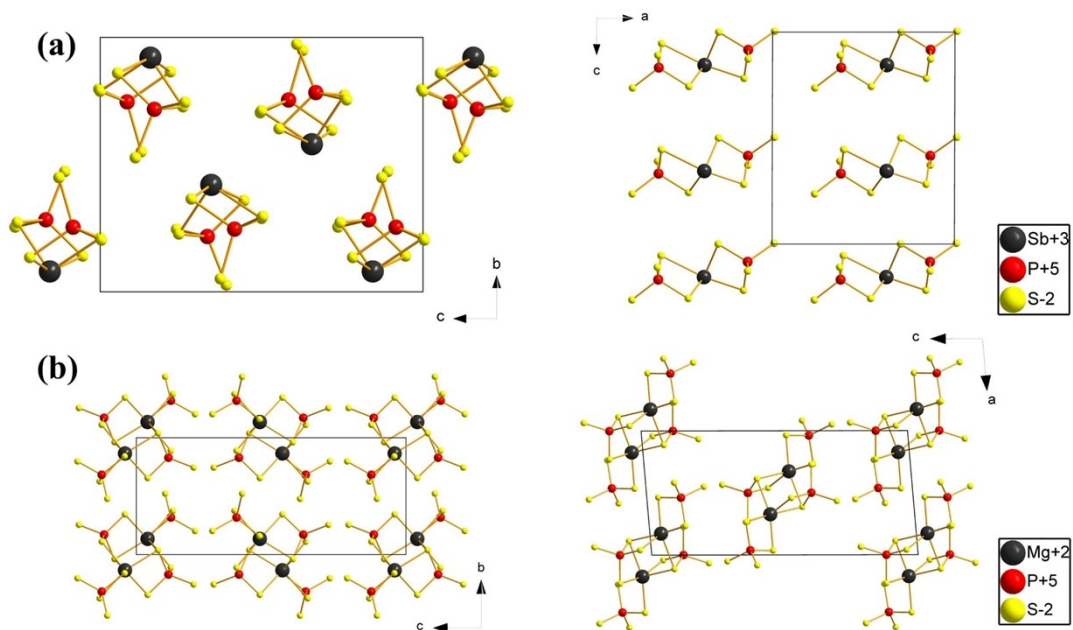

**Fig. S1.** Crystal structures of  $\text{Na}_3\text{SbP}_2\text{S}_8$  (a) and  $\text{Na}_4\text{MgP}_2\text{S}_8$  (b).

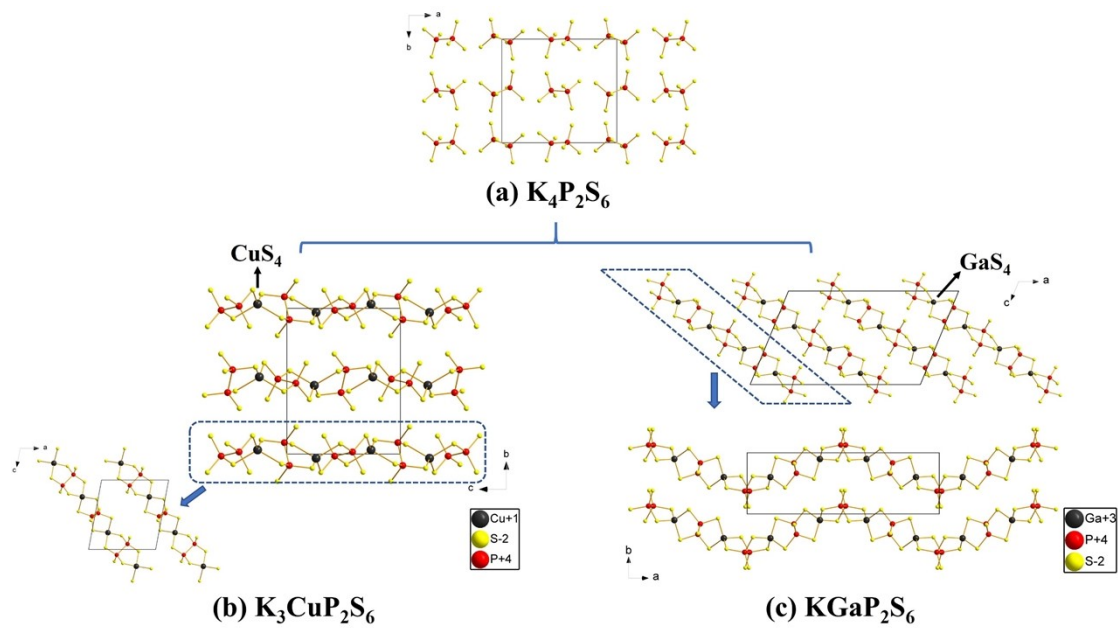

**Fig. S2.** The comparison about  $[\text{P}_2\text{S}_6]^{4-}$  arrangement in  $\text{K}_4\text{P}_2\text{S}_6$  (a),  $\text{K}_3\text{CuP}_2\text{S}_6$  (b) and  $\text{KGaP}_2\text{S}_6$  (c).

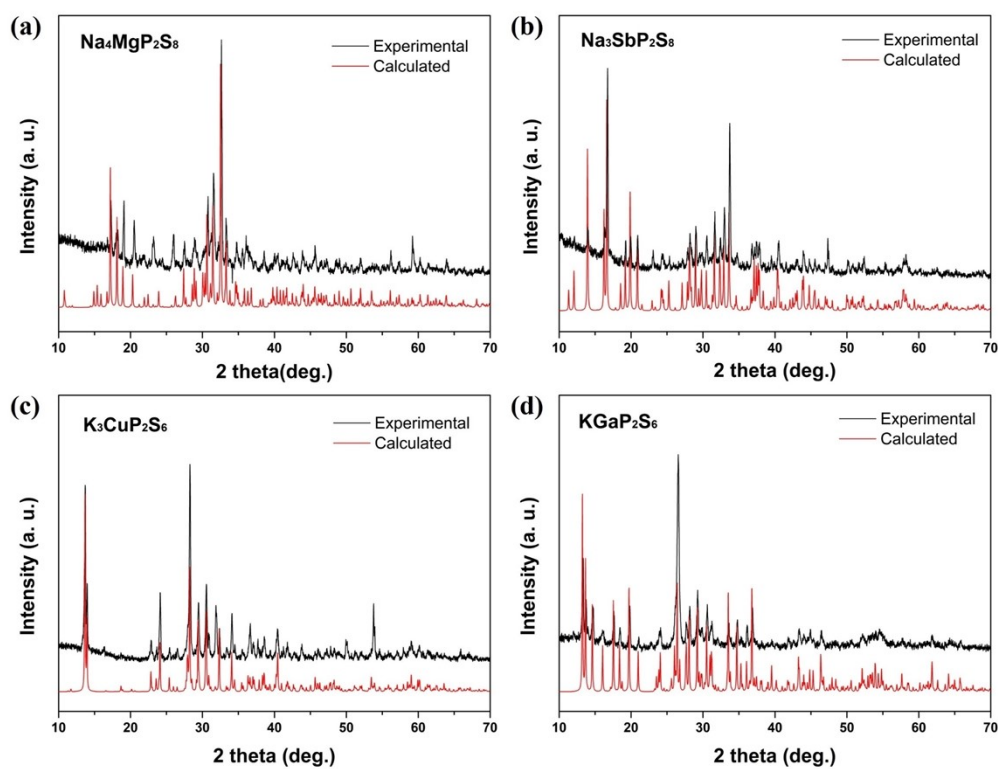

Fig. S3. Powder XRD patterns for (a)  $\text{Na}_4\text{MgP}_2\text{S}_8$ ; (b)  $\text{Na}_3\text{SbP}_2\text{S}_8$ ; (c)  $\text{K}_3\text{CuP}_2\text{S}_6$  and (d)  $\text{KGaP}_2\text{S}_6$ .

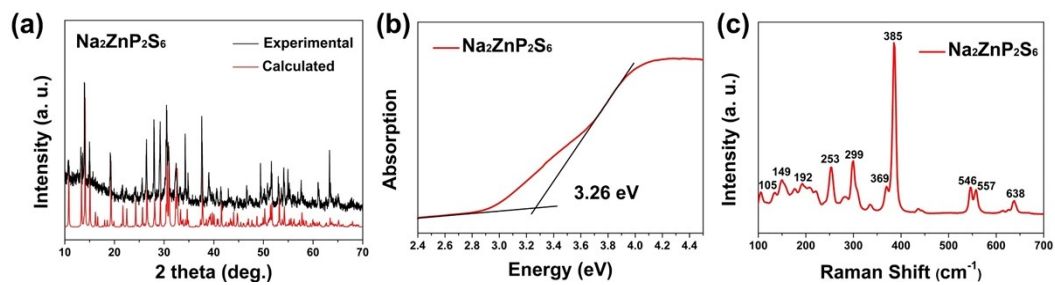

Fig. S4. Powder XRD patterns (a), band gap (b) and Raman spectrum (c) of  $\text{Na}_2\text{ZnP}_2\text{S}_6$ .

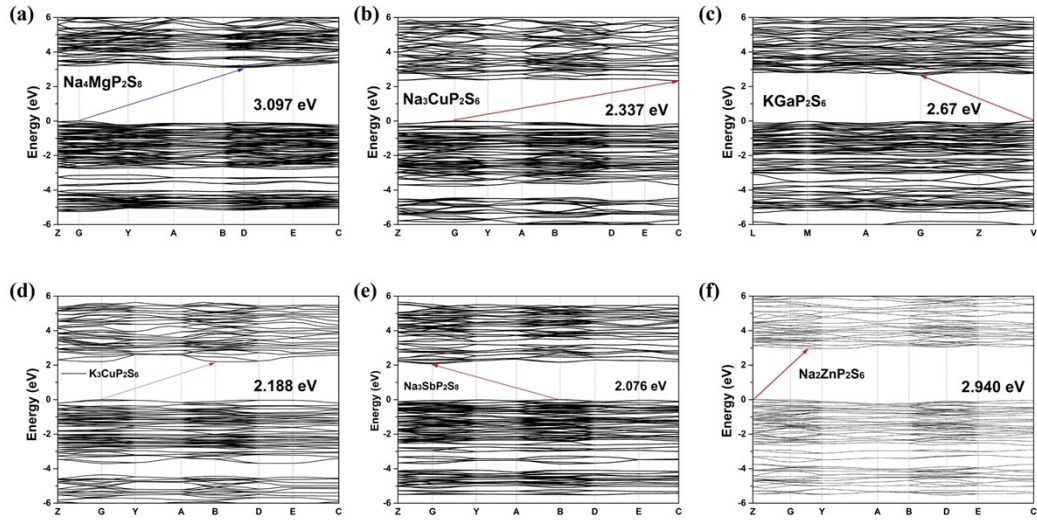

**Fig. S5** Band structures of (a)  $\text{Na}_4\text{MgP}_2\text{S}_8$ ; (b)  $\text{Na}_3\text{CuP}_2\text{S}_6$ ; (c)  $\text{KGaP}_2\text{S}_6$ ; (d)  $\text{K}_3\text{CuP}_2\text{S}_6$ ; (e)  $\text{Na}_3\text{SbP}_2\text{S}_8$  and (f)  $\text{Na}_2\text{ZnP}_2\text{S}_6$ .

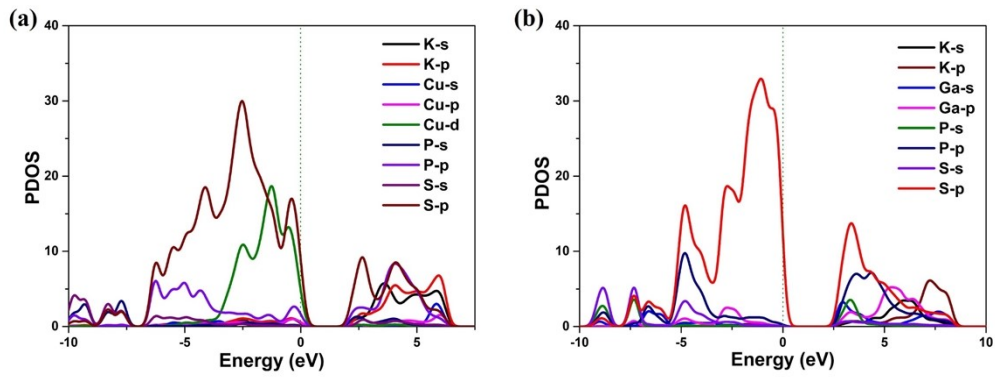

**Fig. S6.** PDOS diagrams of (a)  $\text{K}_3\text{CuP}_2\text{S}_6$  and (b)  $\text{KGaP}_2\text{S}_6$ .

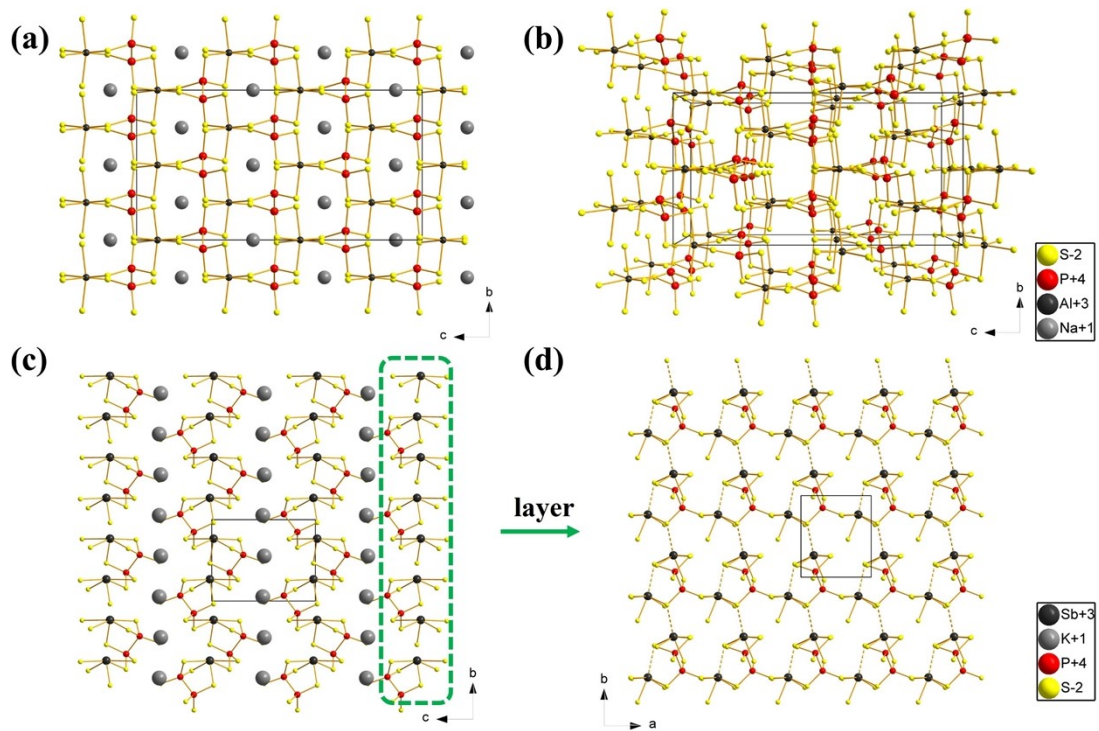

**Fig. S7.** Whole structure (a) and 3D network (b) of  $\text{NaAlP}_2\text{S}_6$ ; whole structure (c) and 2D layer (d) of  $\text{KSbP}_2\text{S}_6$ .

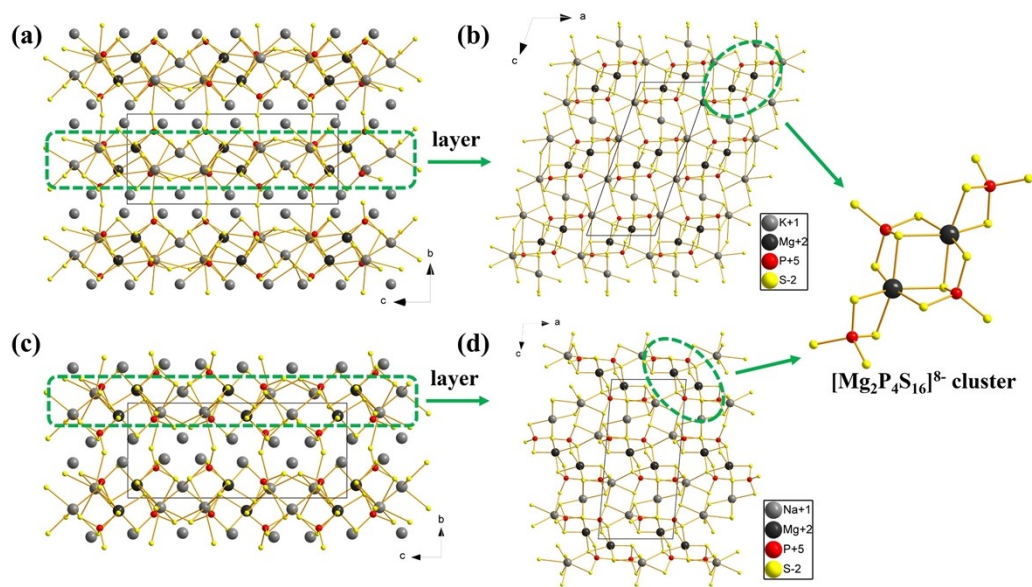

**Fig. S8.** Crystal structures of  $\text{A}_4\text{MgP}_2\text{S}_8$ : whole structure (a) and 2D layer (b) of  $\text{K}_4\text{MgP}_2\text{S}_8$ ; whole structure (c) and 2D layer (d) of  $\text{Na}_4\text{MgP}_2\text{S}_8$ .

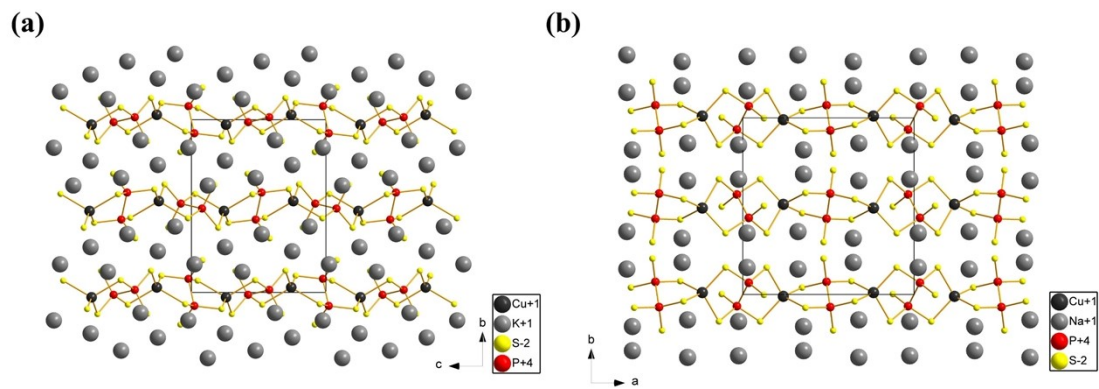

Fig. S9. Crystal structures of  $K_3CuP_2S_6$  (a) and  $Na_3CuP_2S_6$  (b).

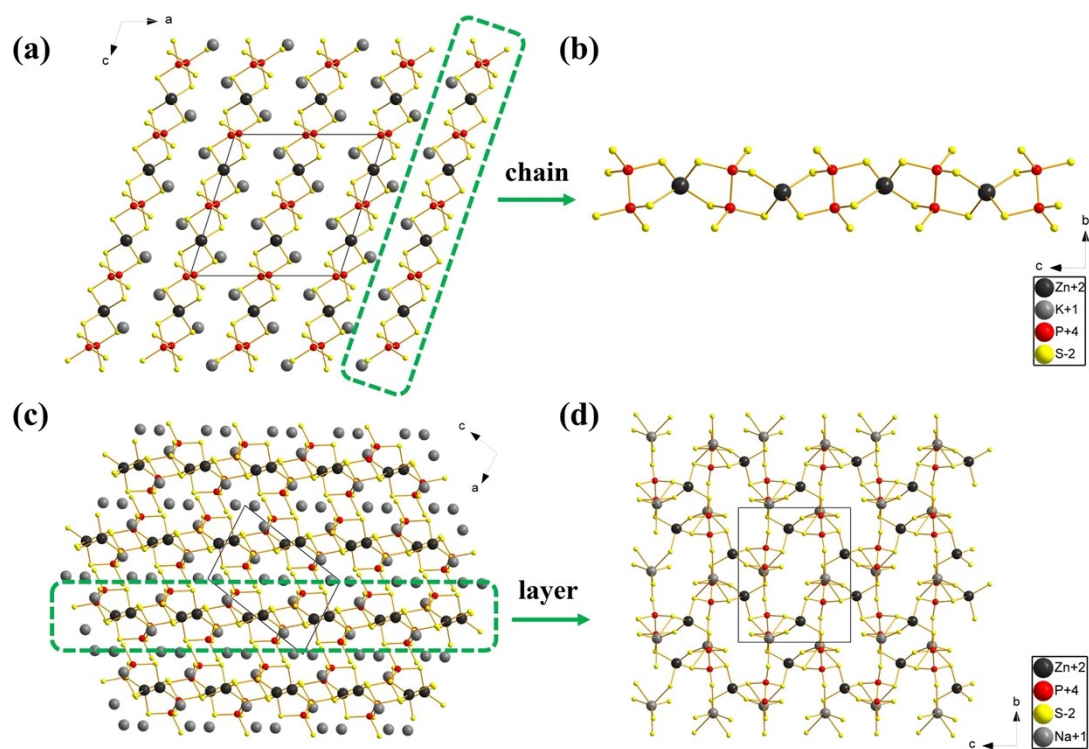

Fig. S10. Crystal structures of  $A_2ZnP_2S_6$ : whole structure (a) and 1D chain (b) of  $K_2ZnP_2S_6$ ; whole structure (c) and 2D layer (d) of  $Na_2ZnP_2S_6$ .



### 3. References

- [1] X. Tian, N. Zhao, K. Wu, J. Xu, D. Lu, H. Yu and H. Zhang, Influence of Cation-Size Effects of Alkaline Earth (Ae) Metals on Dimensionality and Optical Anisotropy Regulation in  $K4AeP2S8$  Thiophosphates, *Inorg. Chem.*, 2024, **63**, 8294–8301.
- [2] A. Kuhn, R. Eger, J. Nuss and B. V. Lotsch, Synthesis and Crystal Structures of the Alkali Aluminium Thiohypodiphosphates  $M^IAlP_2S_6$  ( $M = Li, Na$ ), *Z. Anorg. Allg. Chem.*, 2013, **639**, 1087–1089.
- [3] C. Zhao, D. Lu, X. Tian, J. Xu, B. Zhang, K. Wu, H. Yu and H. Zhang, Noncentrosymmetric  $Na_6Pb_3P_4S_{16}$  and Centrosymmetric  $K_2M^{II}P_2S_6$  ( $M^{II} = Mg$  and  $Zn$ ) Displaying Multiple Membered-Ring Configurations and Strong Optical Anisotropy, *Inorg. Chem.*, 2023, **62**, 21487–21496.
- [4] V. Manriquez, A. Galdámez, D. R. León and M. T. Garland, Crystal structure of potassium antimony hexathiodiphosphate,  $KSbP_2S_6$ , *Z Krist-new Cryst St*, 2003, **218**, 435–436.
- [5] V. Nguyen, B. Ji, K. Wu, B. Zhang and J. Wang, Unprecedented mid-infrared nonlinear optical materials achieved by crystal structure engineering, a case study of  $(KX)P_2S_6$  ( $X = Sb, Bi, Ba$ ), *Chem. Sci.*, 2022, **13**, 2640–2648.
